# Supplementary material for: Varietal Dependence of GLVs Accumulation and LOX-HPL Pathway Gene Expression in Four Vitis vinifera Wine Grapes
Source: MDPI journal article supplement (doi:10.3390/ijms17111924), 2016-11-23
Supplement: s1 [file s1]

# Supplementary Materials: Varietal Dependence of GLVs Accumulation and LOX-HPL Pathway Gene Expression in Four *Vitis vinifera* Wine Grapes

Xu Qian, Xiao-Qing Xu, Ke-Ji Yu, Bao-Qing Zhu, Yi-Bin Lan, Chang-Qing Duan and Qiu-Hong Pan

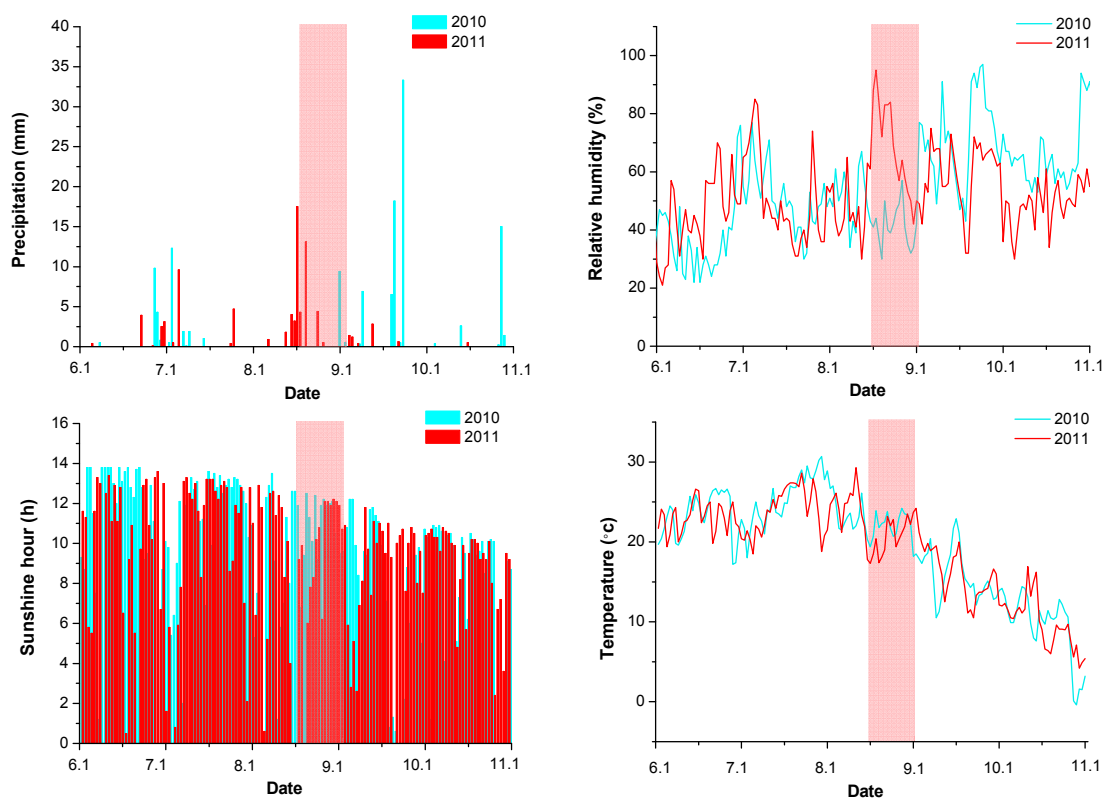

**Figure S1.** Meteorological data (precipitation, relative humidity, sunshine hour and temperature) during grape berry development of 2010 and 2011 in Gaotai, Gansu Province, China. Pink bars represent veraison stage of grapes.

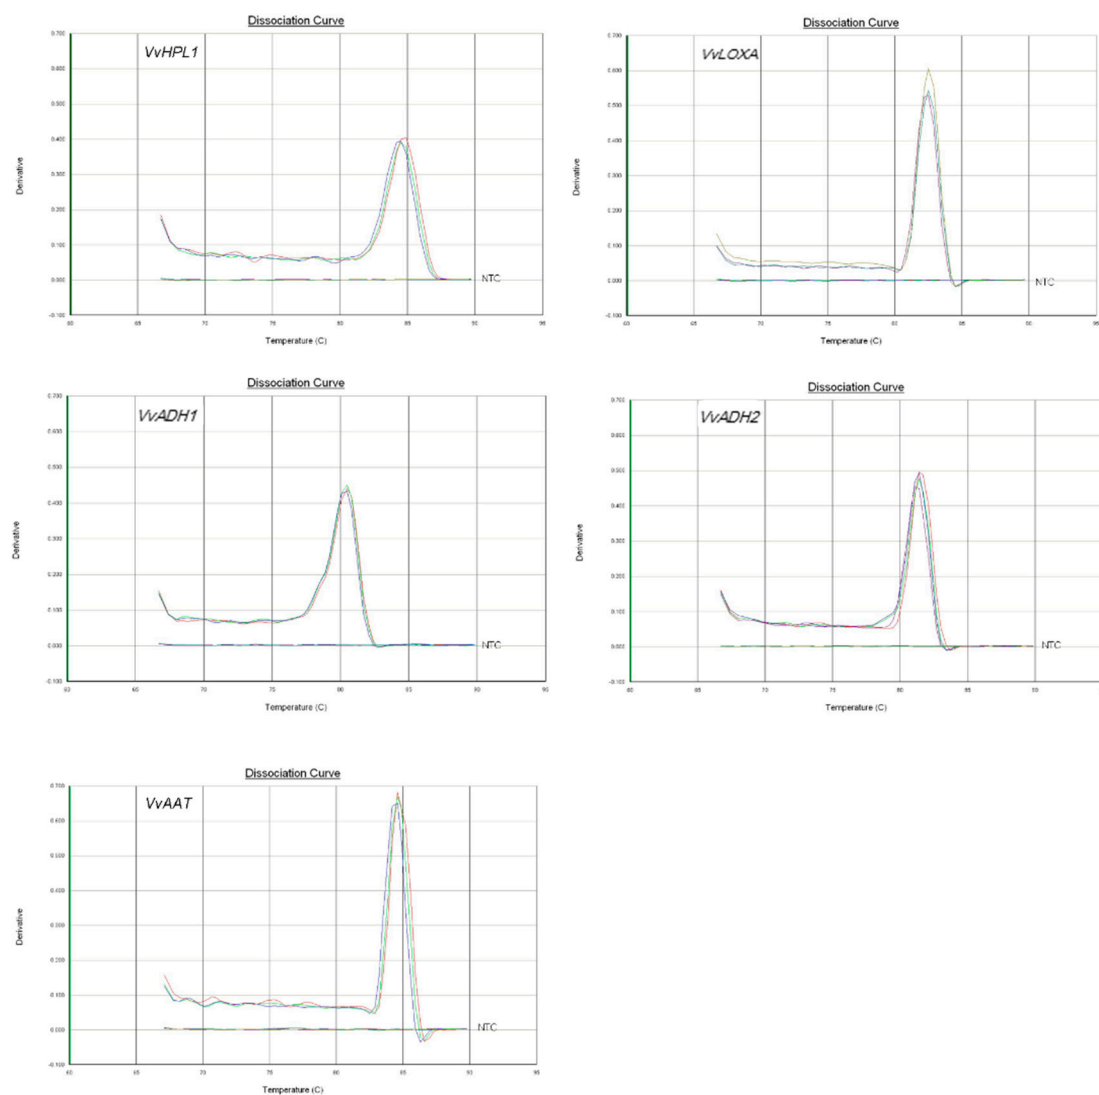

**Figure S2.** Dissociation curves of designed primers for *VvLOXA*, *VvHPL1*, *VvAAT*, *VvADH1* and *VvADH2*. NTC: non template control.
